# Supplementary material
Source: publisher figshare collection journal article supplement (https://sage.figshare.com/ndownloader/files/15631457)
Supplement: Supplementary file 1 [file 15631457]

## Captions to Supplementary Figure

**Fig. S1. Evaluation task.** In the task, participants first saw a fixation cross for 500 ms. Faces of different attractiveness levels (i.e., attractive or unattractive) and gender (male and female) were then presented for 525 ms. Each face presentation was preceded by a pre-mask presented for 100ms and a post-mask presented for 30ms. After the post-mask presentation, participants were prompted to provide their judgments (self-paced with max. 3s time). Attractiveness levels, face's gender and judgment type (attractiveness/trustworthiness) were randomized.

**Fig. S2. Effects of gender and attractiveness levels.** Participants judged attractive faces as significantly more attractive than unattractive faces. Moreover, female faces were judged as significantly more attractive than male faces.
